# Supplementary material for: Identification of C/EBPα as a novel target of the HPV8 E6 protein regulating miR-203 in human keratinocytes
Source: PubMed Central journal article supplement (PMC5481020; doi:10.1371/journal.ppat.1006406), 2017-06-22
Supplement: ppat.1006406.s008.pdf [file ppat.1006406.s008.pdf]

**S1 Table. siRNA and hsa-miR-203 mimic sequences. (Dharmacon, Freiburg, Germany)**

| siRNA as indicated in figure | siRNA                                       | Target sequence                                                                                                  |
|------------------------------|---------------------------------------------|------------------------------------------------------------------------------------------------------------------|
| si-control                   | ON-TARGETplus Control Non-targeting siRNA#2 | 5'-ugguuuacauguuguguga-3'                                                                                        |
| p300 si pool                 | p300 ON-TARGETplus SMARTpool                | 5'-ggacuaccuaucaaguaa-3'<br>5'-gacaagggauaaugccuaa-3'<br>5'-guucaauaaugccugguua-3'<br>5'-cgacaggggaugcagcaaca-3' |
| p300 si1                     | p300 ON-TARGETplus 1                        | 5'-guucaauaaugccugguua-3'                                                                                        |
| p300 si2                     | p300 ON-TARGETplus 2                        | 5'-cgacaggggaugcagcaaca-3'                                                                                       |
| C/EBP $\alpha$ si pool       | C/EBP $\alpha$ ON-TARGETplus SMARTpool      | 5'-acaugaccgccugcgcaa-3'<br>5'-cacgagacguccaucgaca-3'<br>5'-gaacagcugagccgcaac-3'<br>5'-gaacagcaacgaguaccgg-3'   |
| C/EBP $\alpha$ si1           | C/EBP $\alpha$ ON-TARGETplus 1              | 5'-cacgagacguccaucgaca-3'                                                                                        |
| C/EBP $\alpha$ si2           | C/EBP $\alpha$ ON-TARGETplus 2              | 5'-gaacagcugagccgcaac-3'                                                                                         |
| p63 si                       | p63 ON-TARGETplus SMARTpool                 | 5'-gaugaacuguuauacuuac-3'<br>5'-cgacagucuuguacaauuu-3'<br>5'-gcacacagacaaaugaauu-3'<br>5'-ucuaucagauugagcauuu-3' |
| miR-203 mimic                | miRDIAN hsa-miR-203 mimic                   | 5'-gugaaauguuuaggaccacuag-3'                                                                                     |
| control-mimic                | miRDIAN microRNA Mimic Negative control #1  | unknown                                                                                                          |
