# Supplementary material for: Identification of C/EBPα as a novel target of the HPV8 E6 protein regulating miR-203 in human keratinocytes
Source: PubMed Central journal article supplement (PMC5481020; doi:10.1371/journal.ppat.1006406), 2017-06-22
Supplement: ppat.1006406.s009.pdf [file ppat.1006406.s009.pdf]

**S2 Table. qRT-PCR oligonucleotide sequences and corresponding UPL hydrolysis probes from Roche Diagnostics.**

| <b>mRNA</b>            | <b>Sequence</b>                                                 | <b>UPL-Probe</b> |
|------------------------|-----------------------------------------------------------------|------------------|
| C/EBP $\alpha$         | 5'- GTGGACAAGAACAGCAACGA-3'<br>5'- CACTGGTCAGCTCCAGCAC-3'       | #84              |
| C/EBP $\beta$          | 5'- CTGGAGACGCAGCACAAG-3'<br>5'- ACAGCTGCTCCACCTTCTTC-3'        | #1               |
| $\Delta$ Np63 $\alpha$ | 5'- GGAAAACAATGCCCAGACTC-3'<br>5'- CTGCTGGTCCATGCTGTTC-3'       | #45              |
| Involucrin             | 5'- AAGGGATCAGCAGCTAAACAAA-3'<br>5'- TTGATCCAGTTGCTGGTCTAAG-3'  | #11              |
| MAML                   | 5'- TATGCCTTTCCGATCACTGG-3'<br>5'- CTGGGTCCCAACACTGGTAG-3'      | #68              |
| p300                   | 5'- CAAGCAAAGAACCAGCAGAA-3'<br>5'- CATTACTCCCATAGGACTAGCACTC-3' | #64              |
| RPL13A                 | 5'- AGCGGATGAACACCAACC-3'<br>5'- TTTGTGGGGCAGCATACTC-3'         | #28              |
