# Supplementary material for: Identification of C/EBPα as a novel target of the HPV8 E6 protein regulating miR-203 in human keratinocytes
Source: PubMed Central journal article supplement (PMC5481020; doi:10.1371/journal.ppat.1006406), 2017-06-22
Supplement: ppat.1006406.s010.pdf [file ppat.1006406.s010.pdf]

**S3 Table. Knock-down efficiencies of siRNAs quantified by qRT-PCR (% reduction of mRNA expression in comparison to si-control).**

|                | siRNA 1 | siRNA 2 | pool |
|----------------|---------|---------|------|
| p63            | -       | -       | 70%  |
| p300           | 81%     | 65%     | 60%  |
| C/EBP $\alpha$ | 72%     | 80%     | 52%  |
